# Supplementary material for: CircRNA-5335 Regulates the Differentiation and Proliferation of Sheep Preadipocyte via the miR-125a-3p/STAT3 Pathway
Source: MDPI journal article supplement (doi:10.3390/vetsci11020070), 2024-02-04
Supplement: s1 [file s1]

**Supplementary Materials: CircRNA-5335 Regulates the  
Differentiation and Proliferation of Sheep Preadipocyte  
via the miR-125a-3p/STAT3 Pathway**

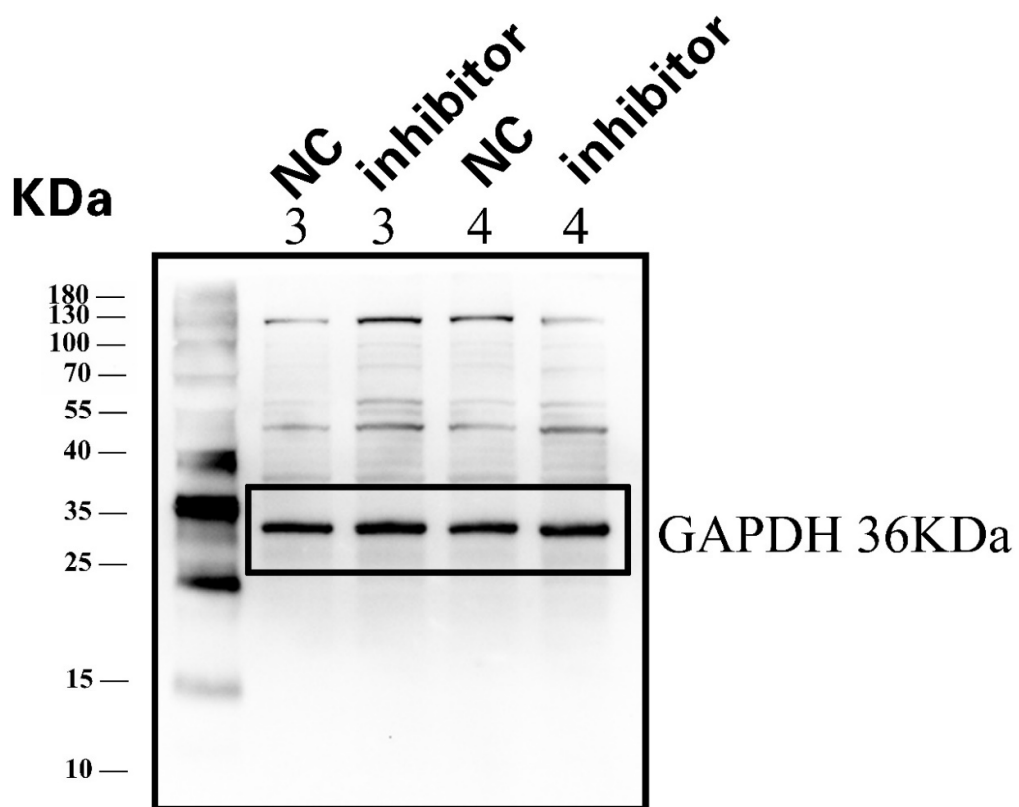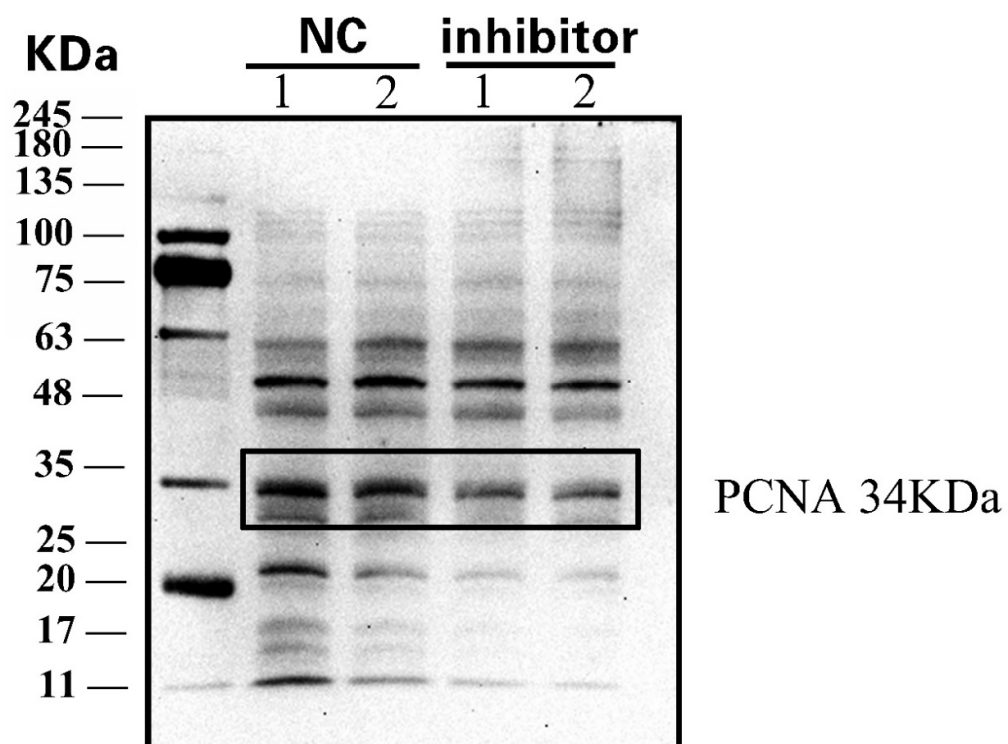

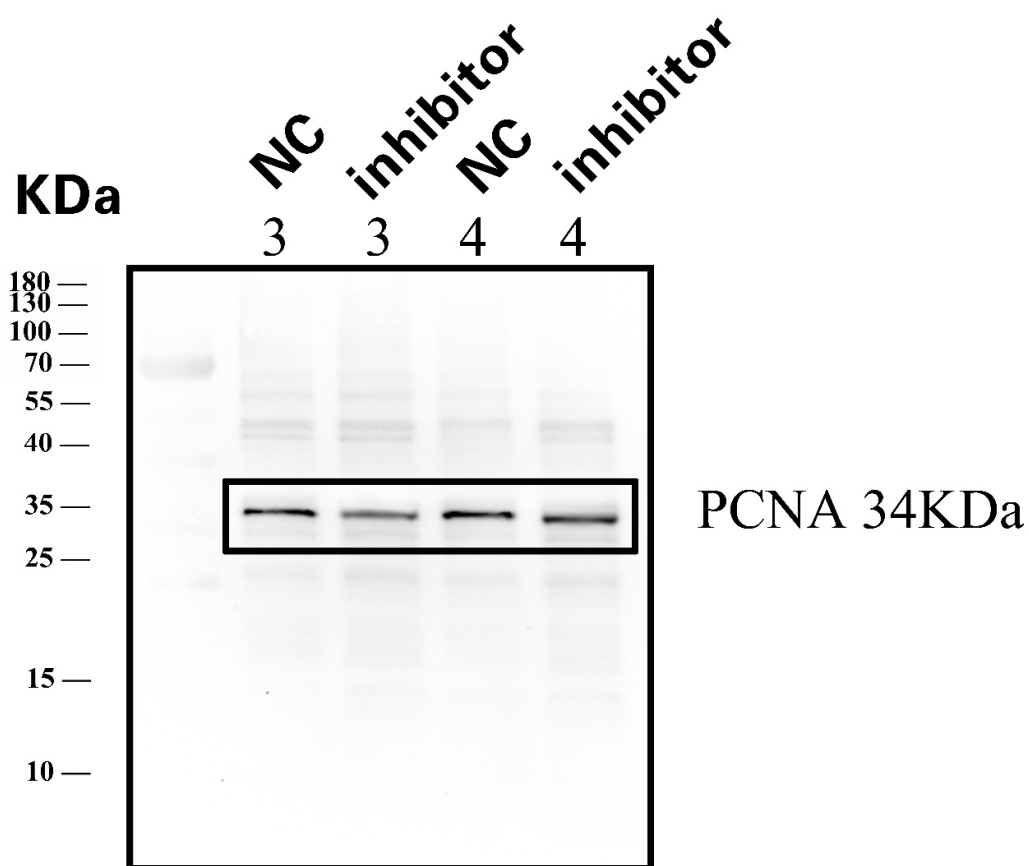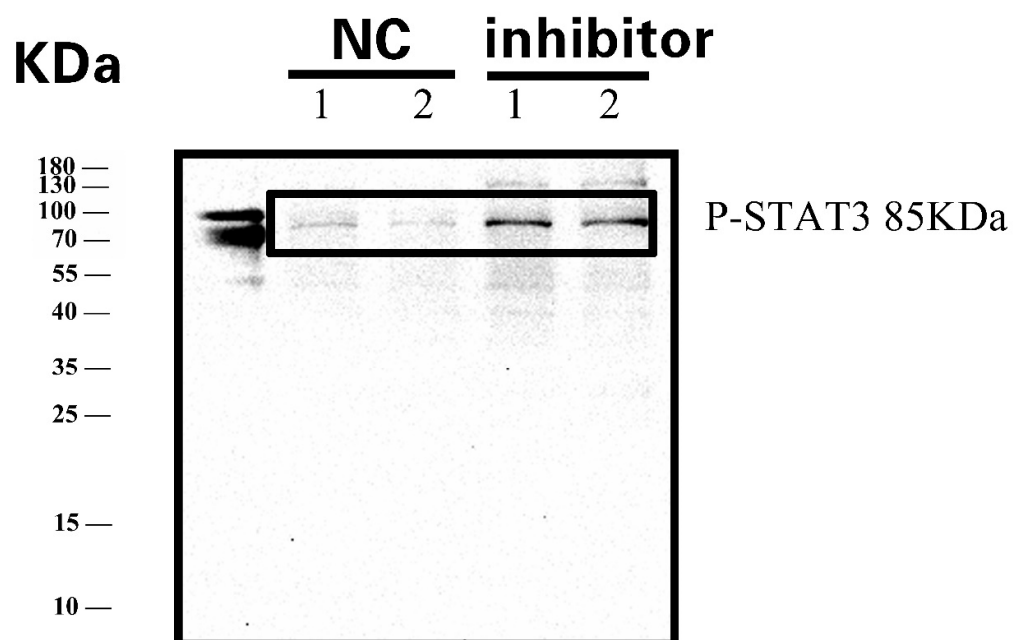

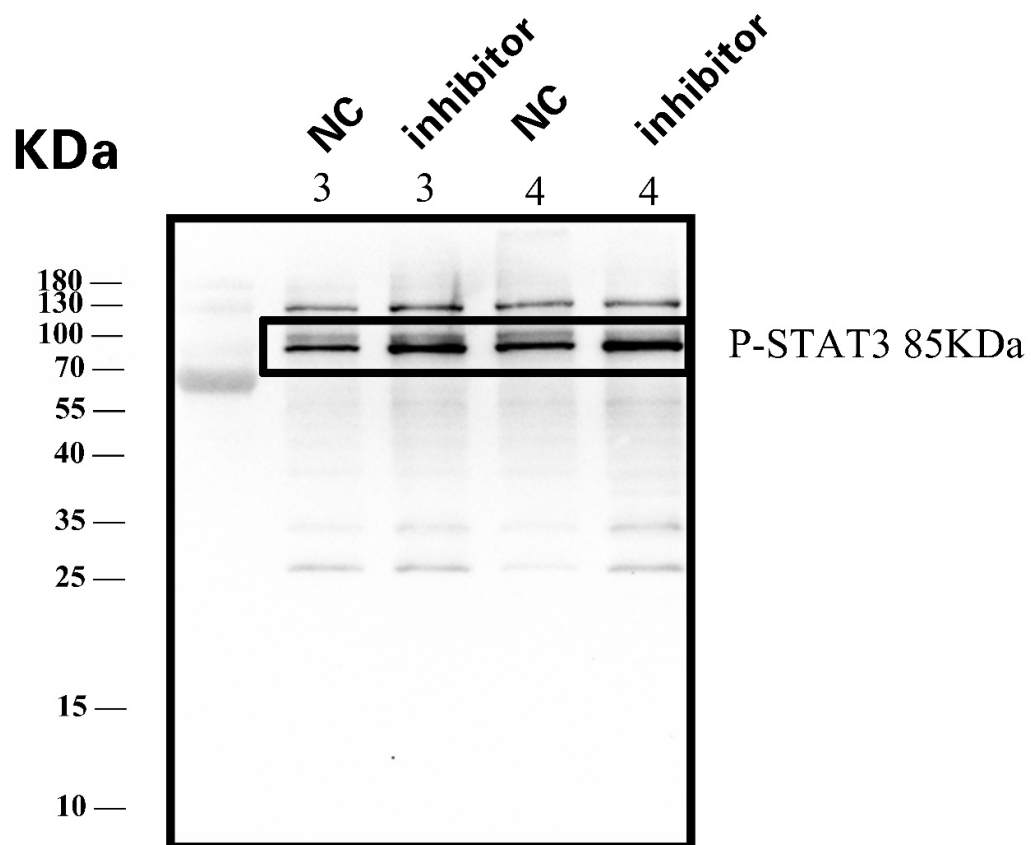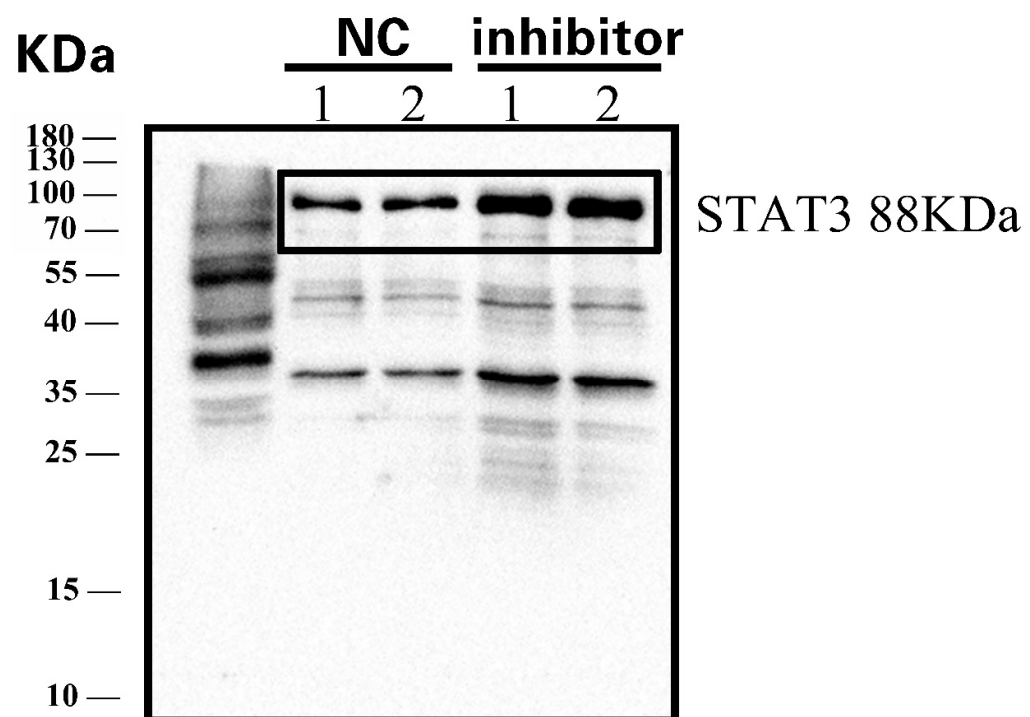

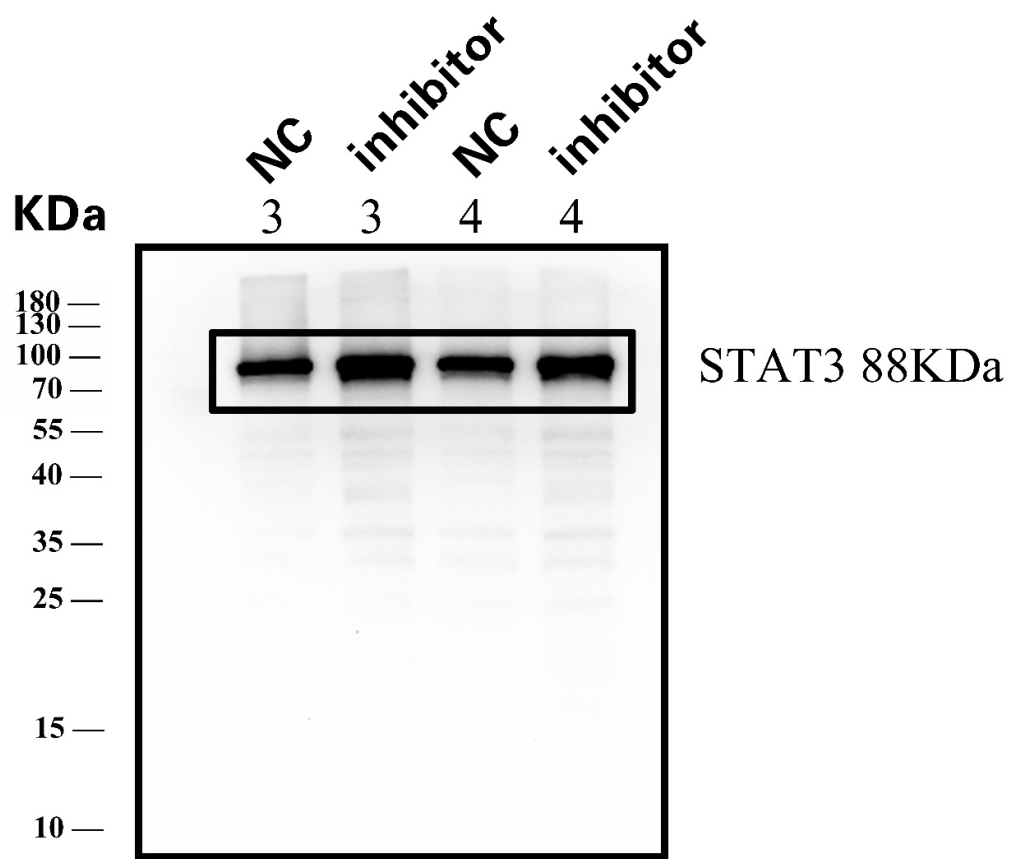

**Figure S1.** Alterations in the expression of GAPDH, STAT3, P-STAT3, and PCNA proteins were observed in preadipocytes treated with either a miR-125a-3p inhibitor or a negative control (NC) construct.

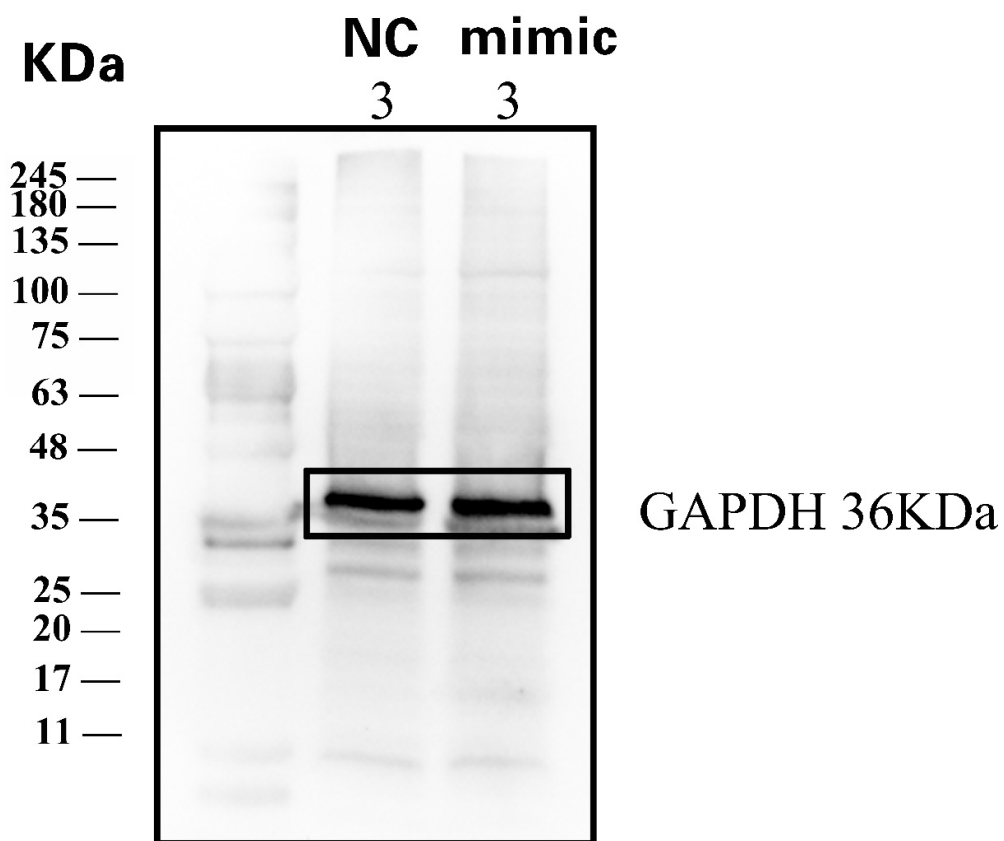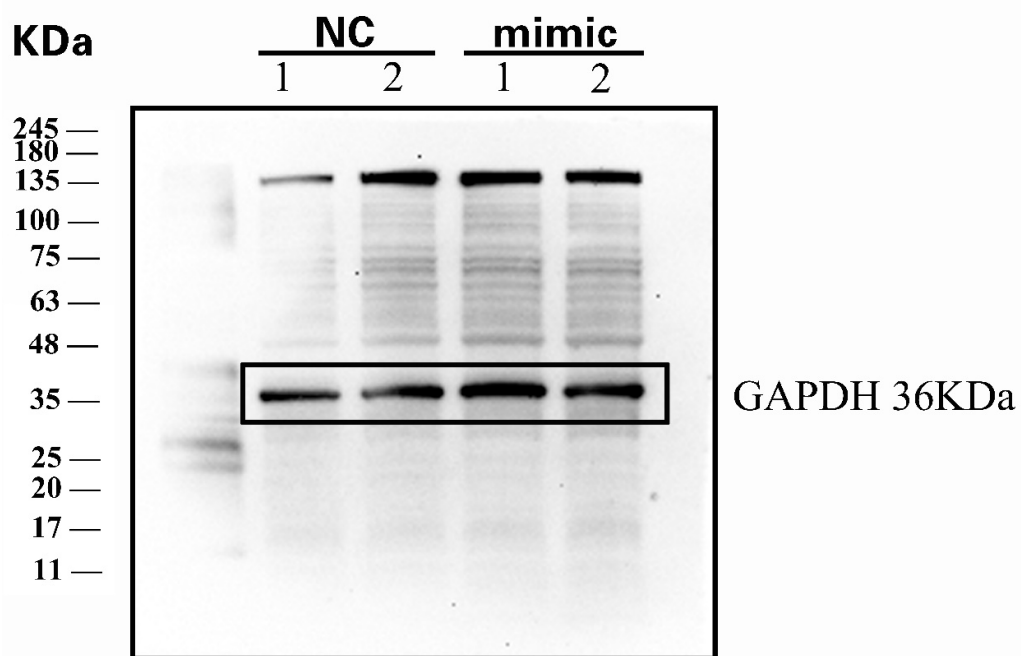

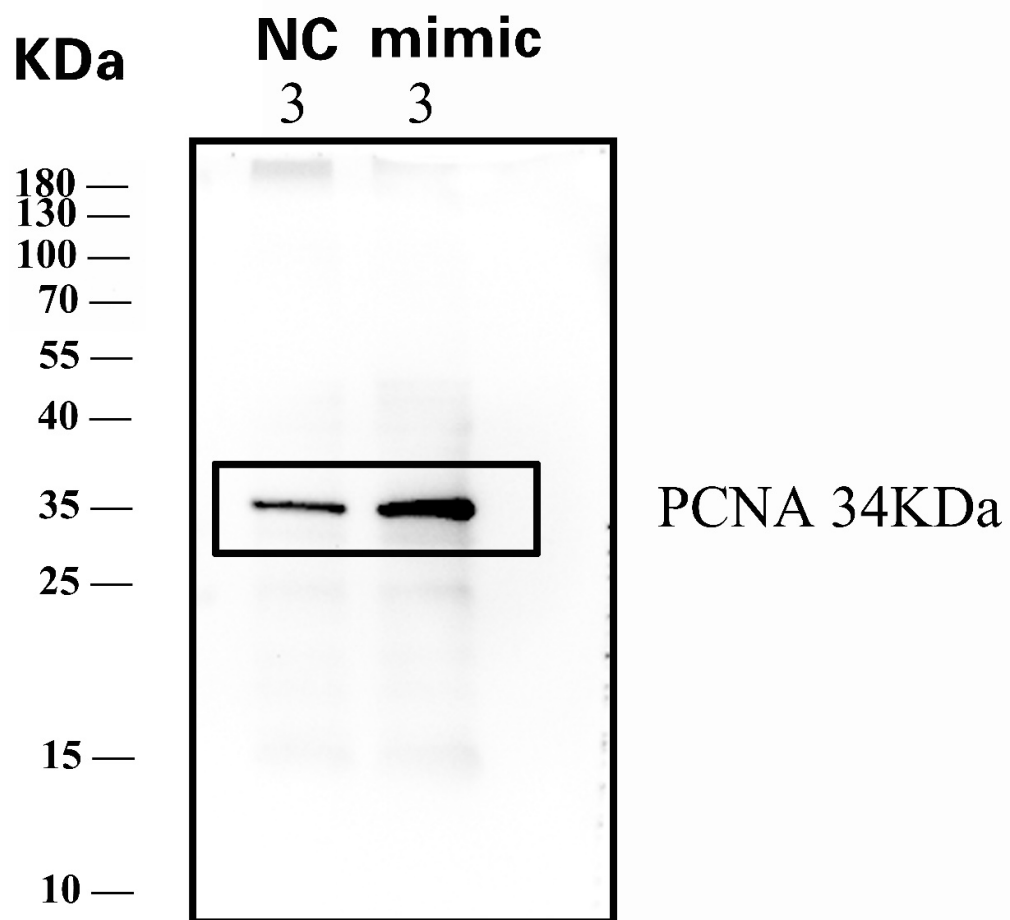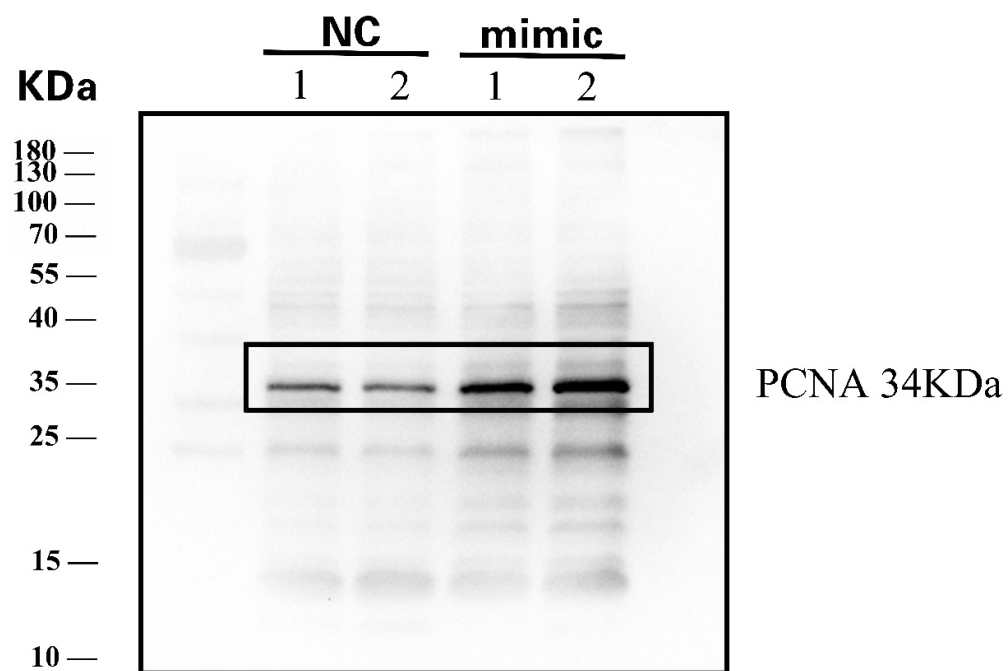

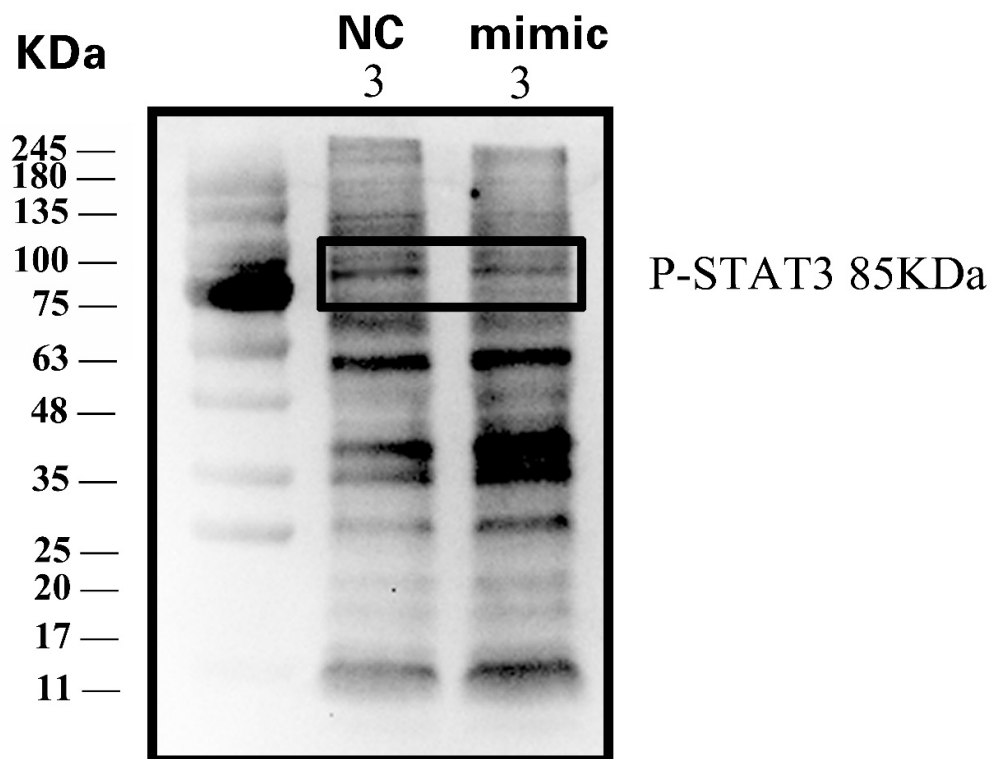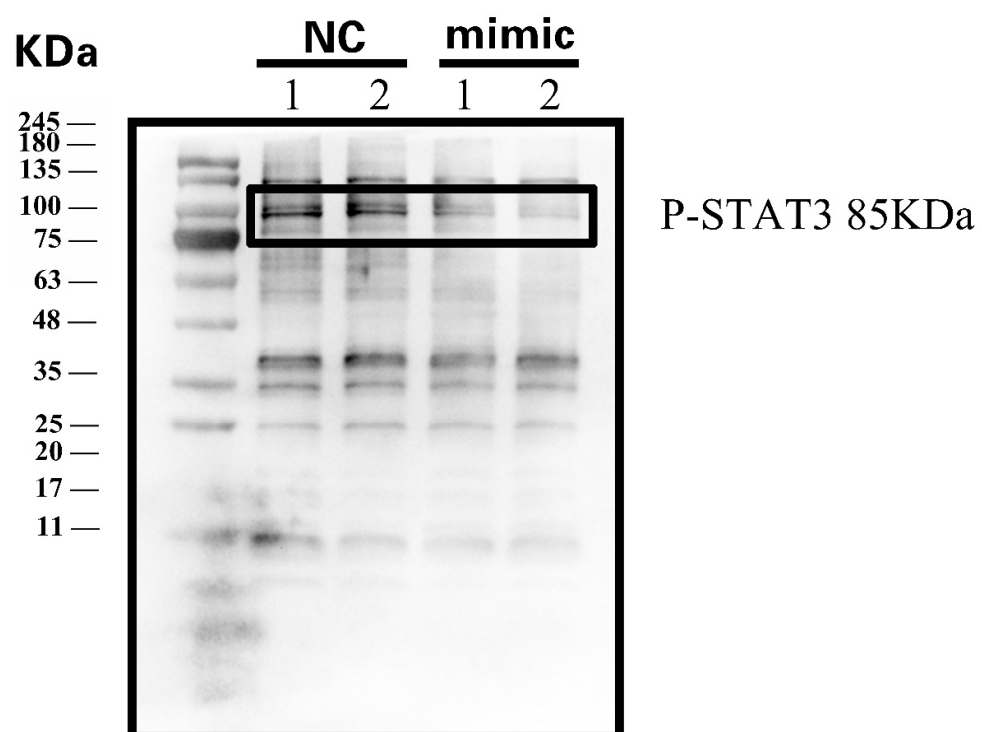



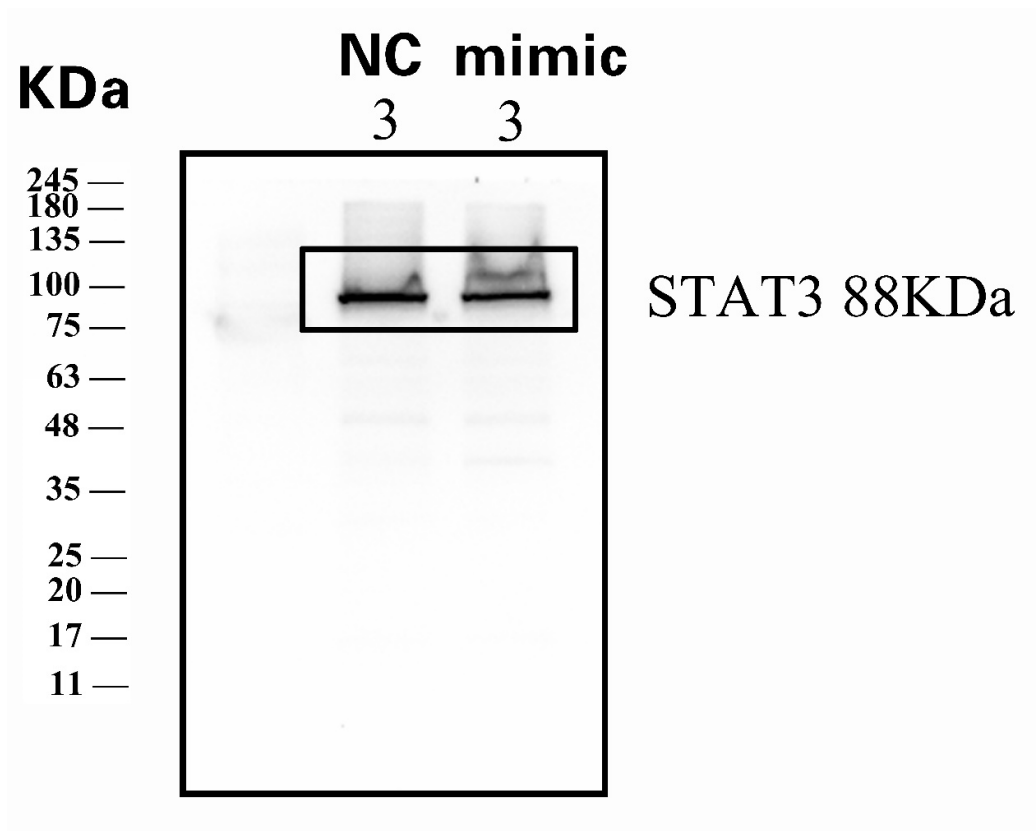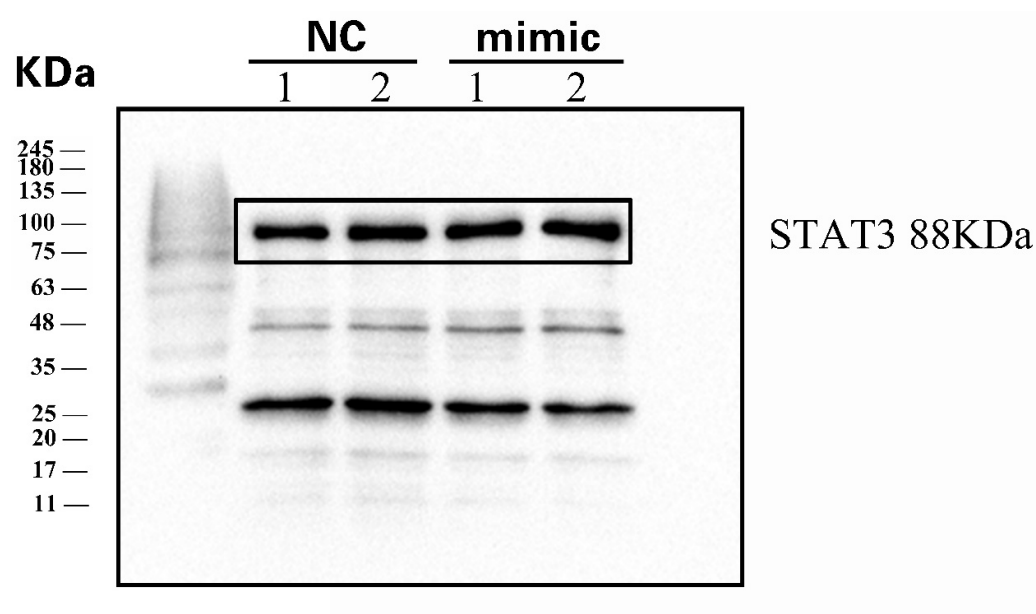

**Figure S2.** Alterations in the expression of GAPDH, STAT3, P-STAT3, and PCNA proteins were observed in preadipocytes treated with either a miR-125a-3p mimic or a negative control (NC) construct.

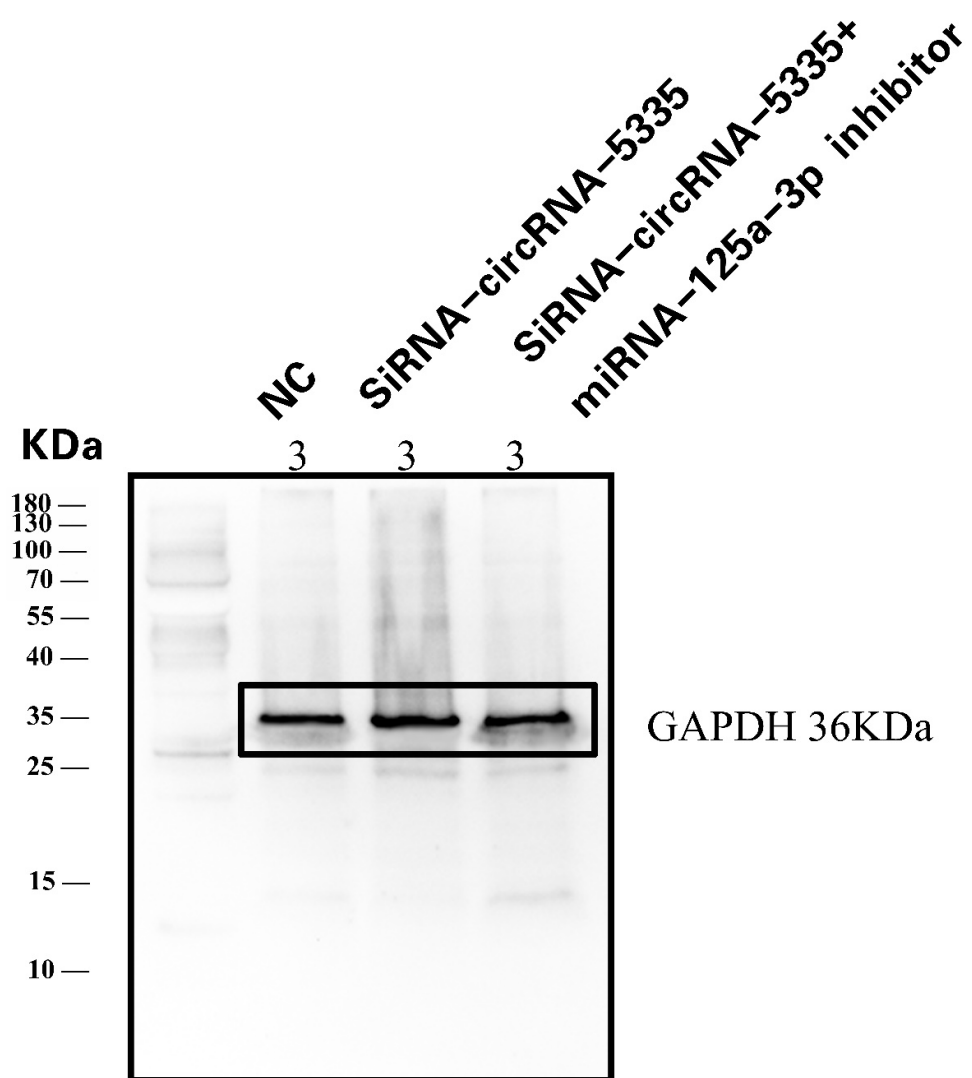

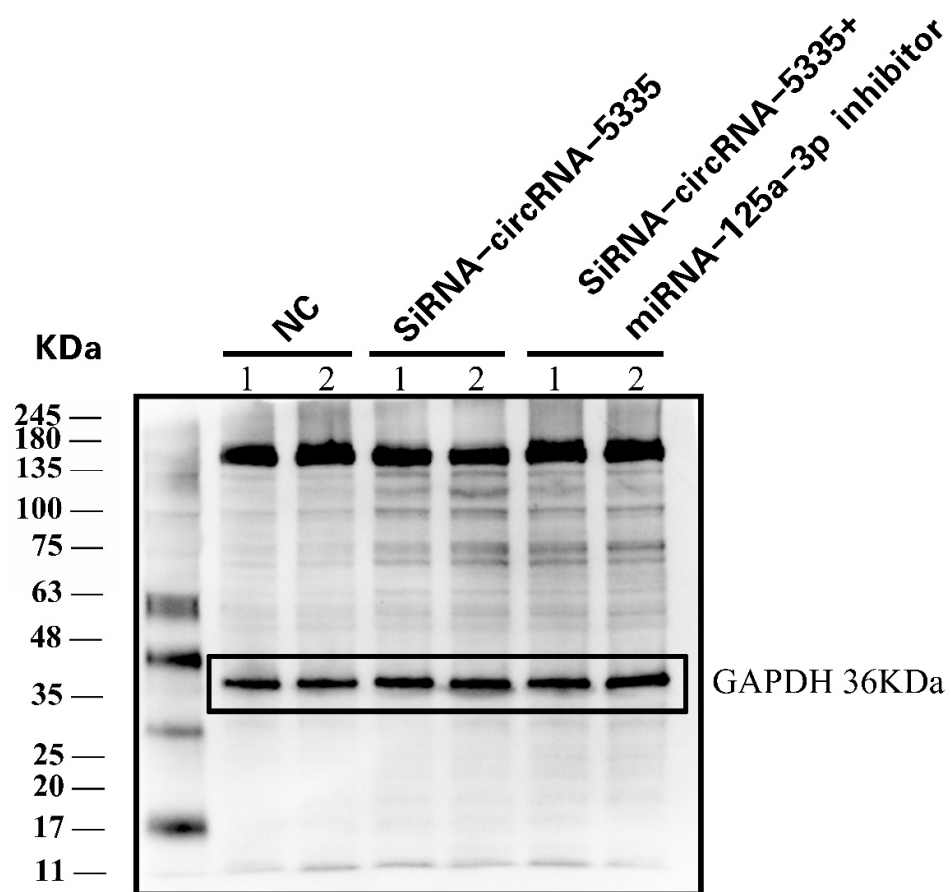

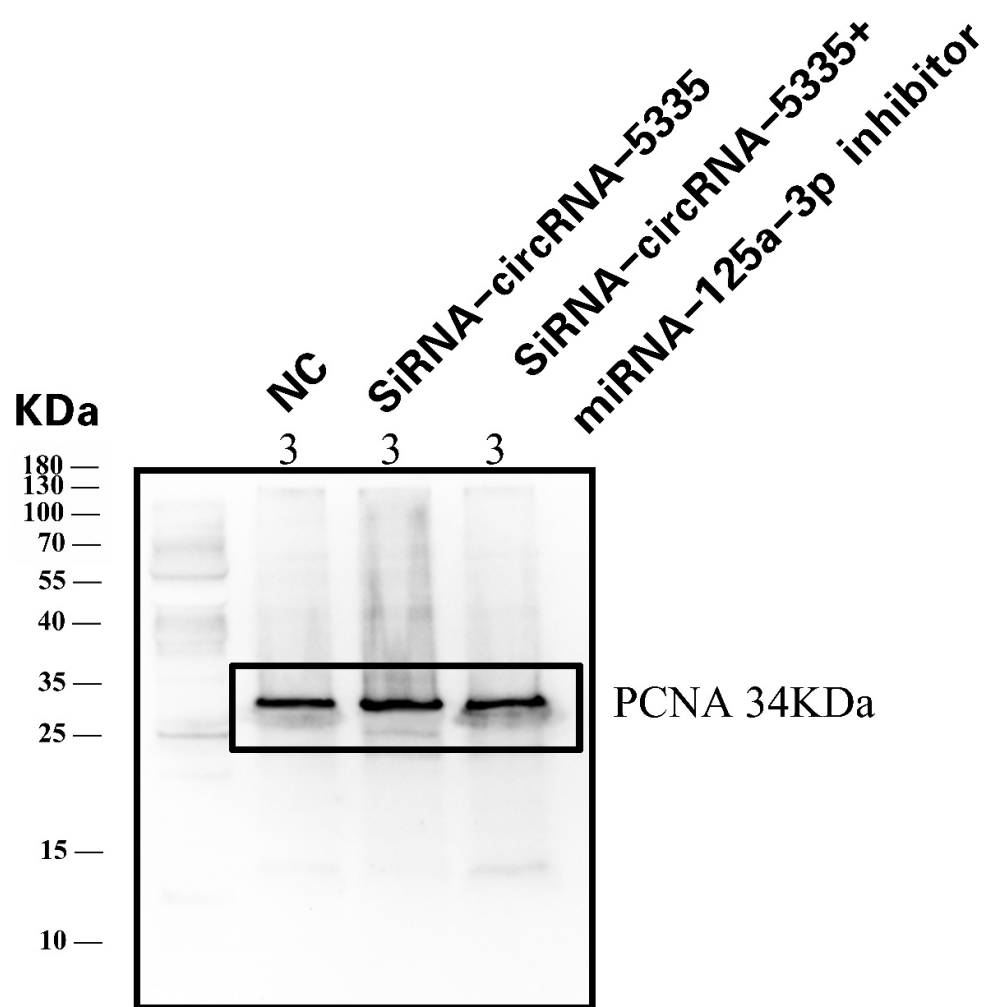

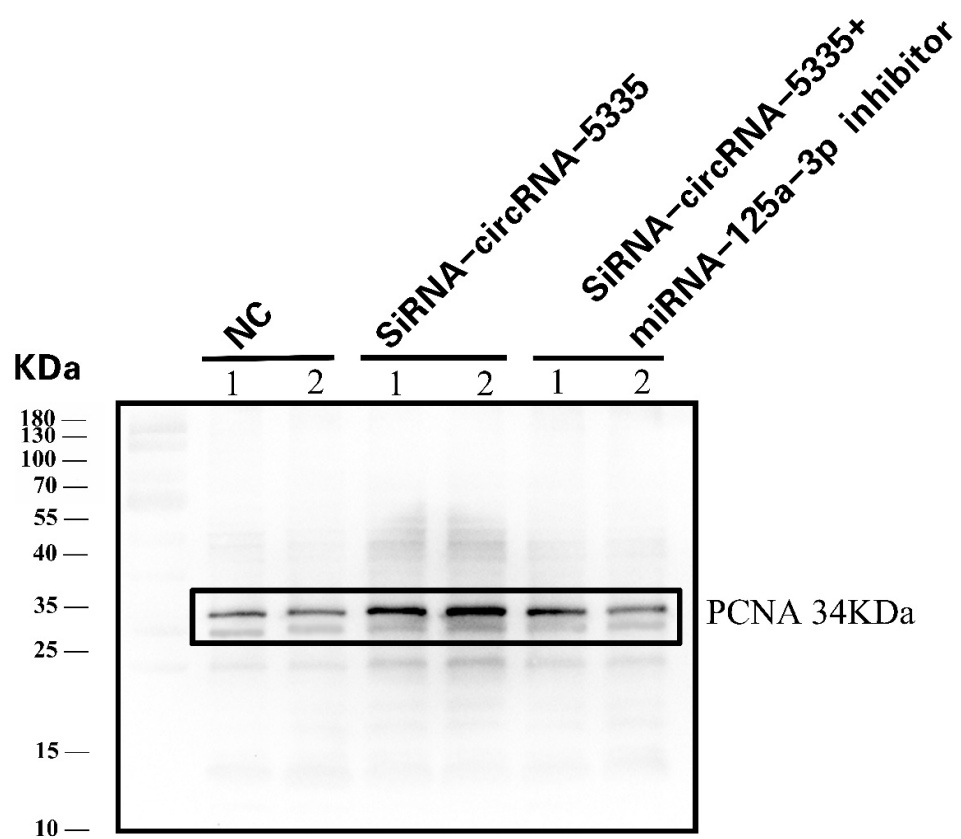

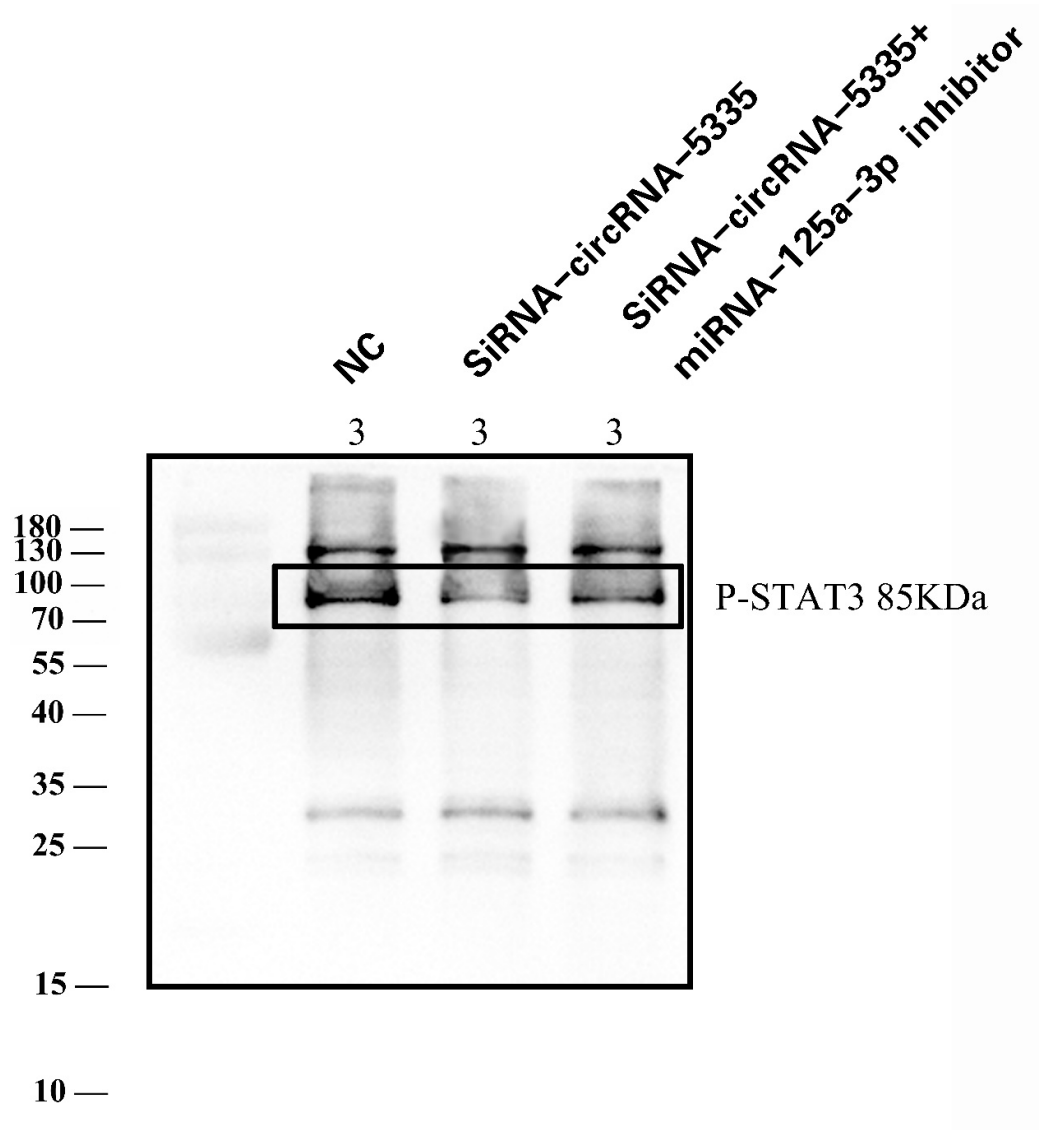

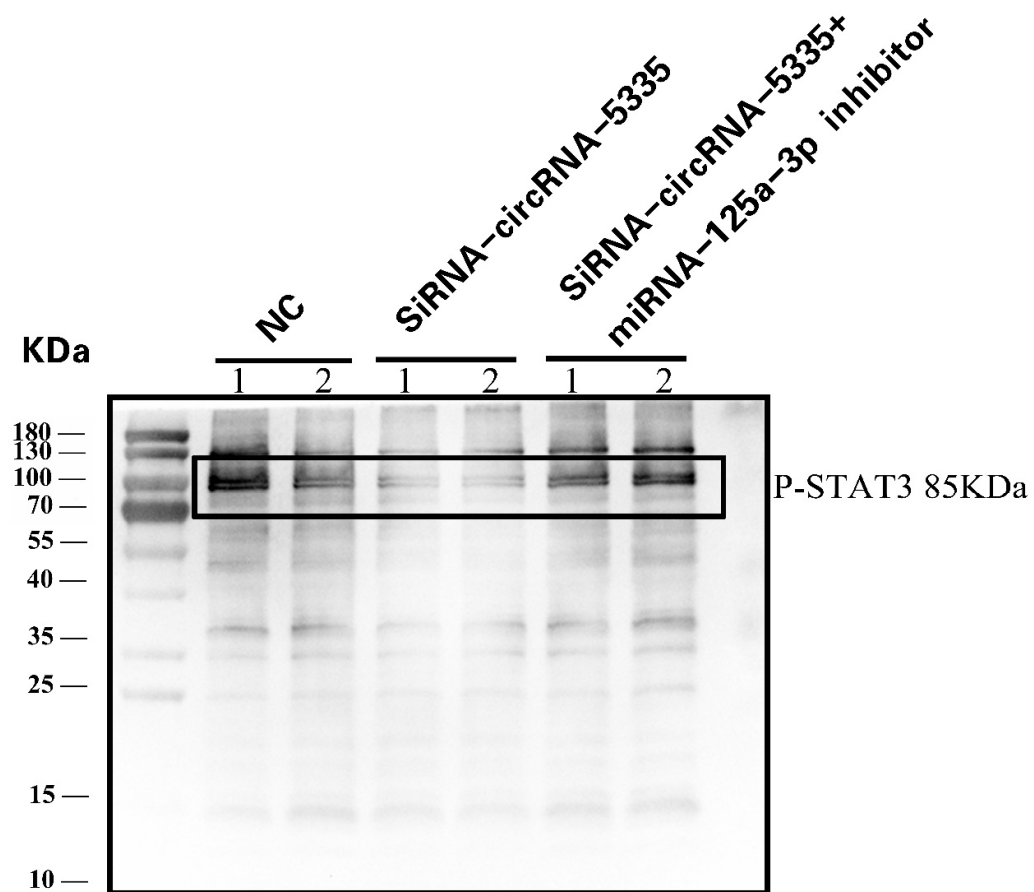

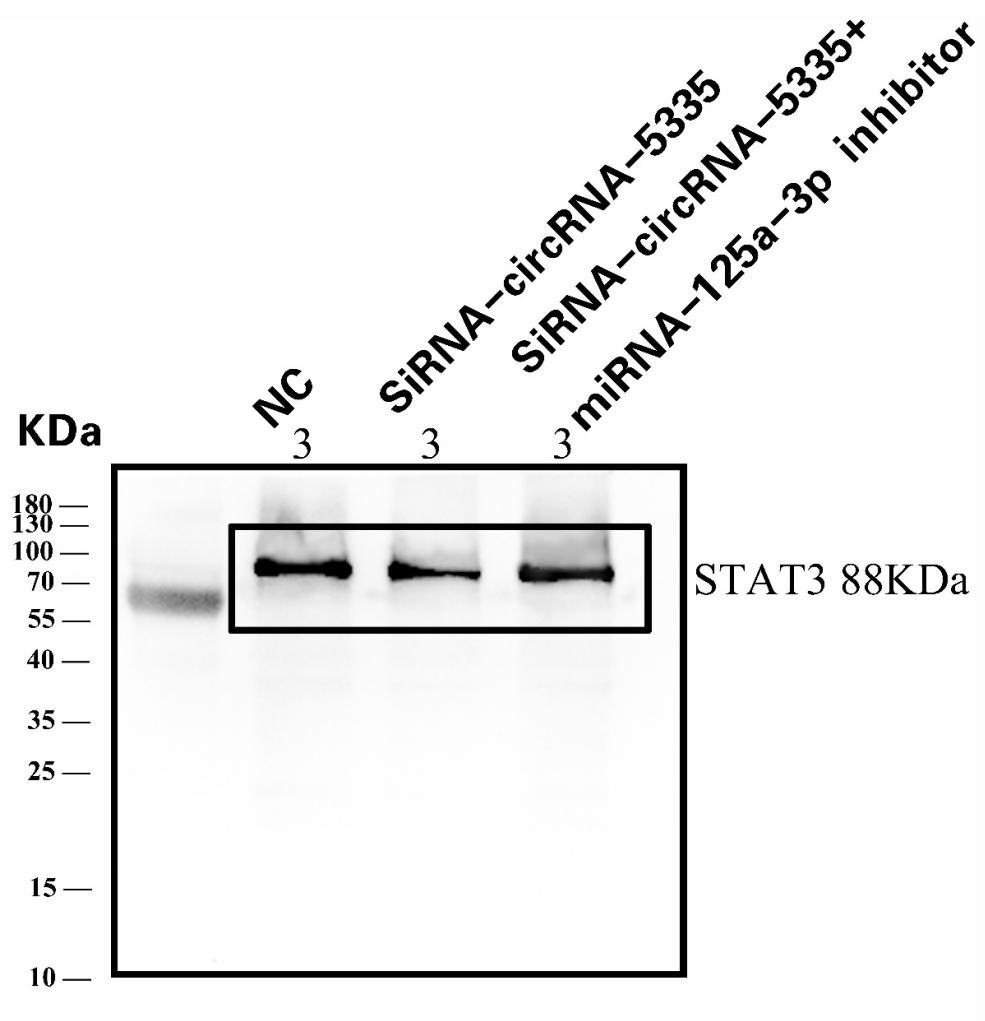



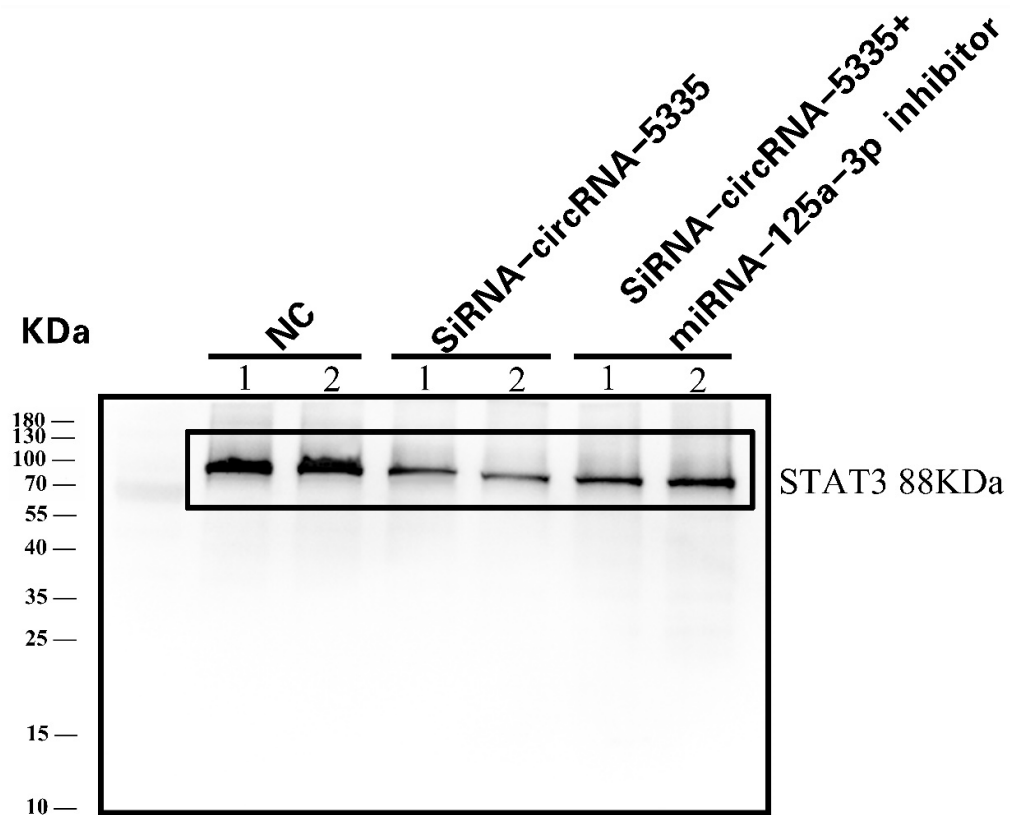

**Figure S3.** Alterations in the expression of GAPDH, STAT3, P-STAT3, and PCNA proteins were observed in preadipocytes treated with SiRNA-circRNA-5335 and co-transfected with miR-125a-3p or a negative control (NC) construct.

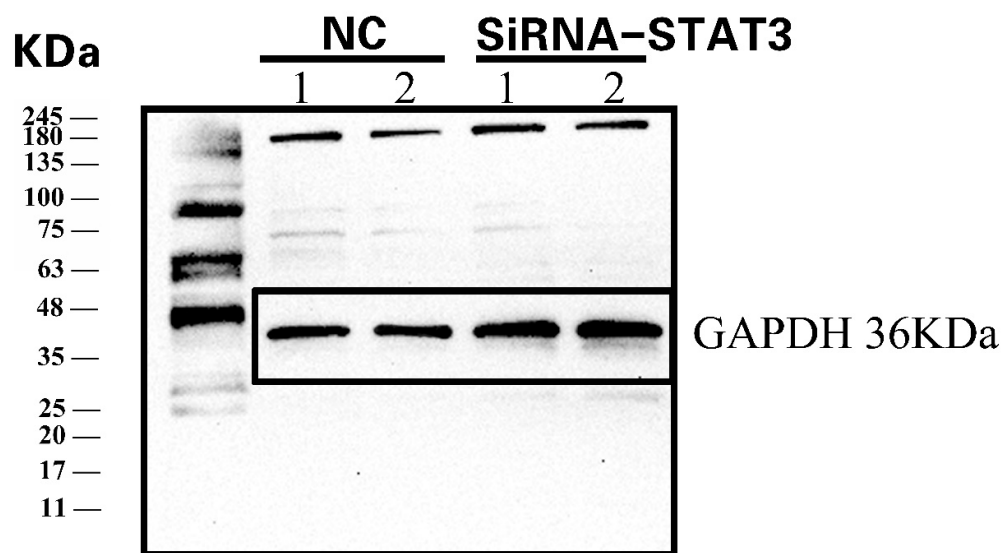

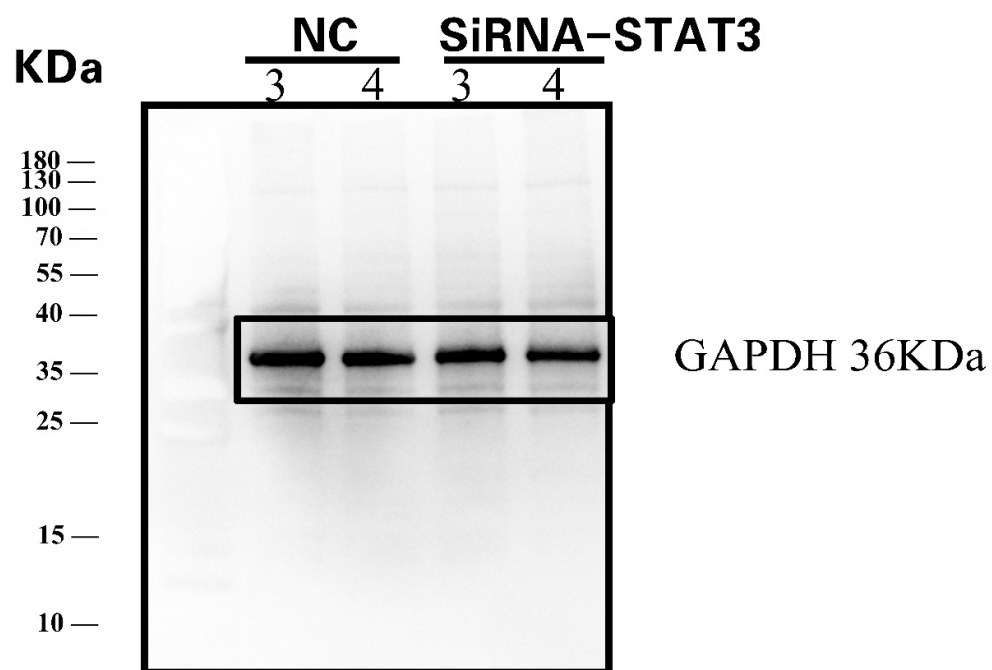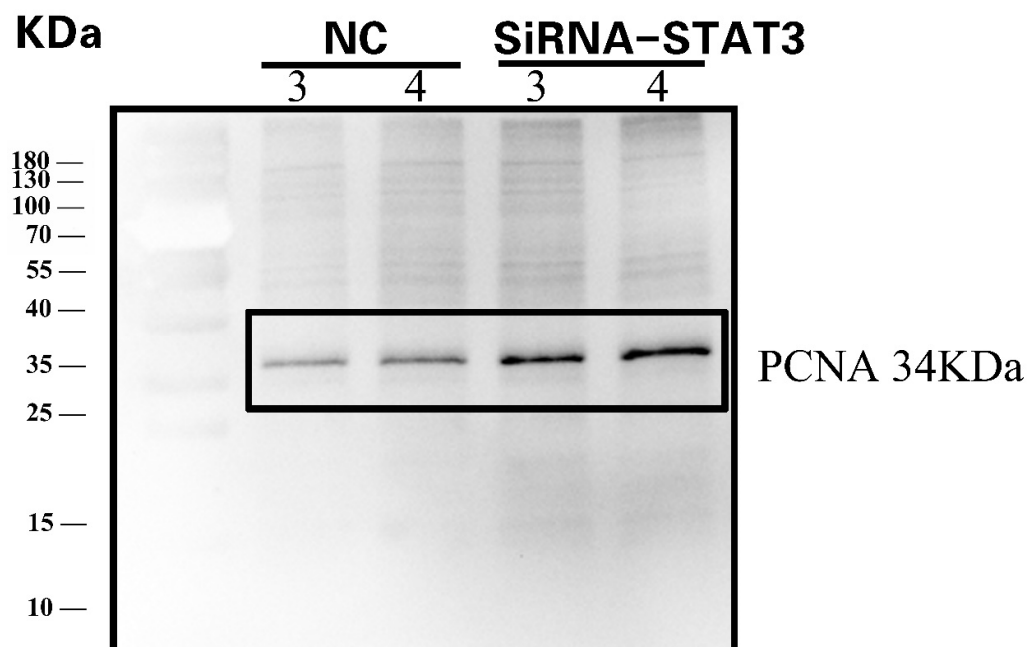

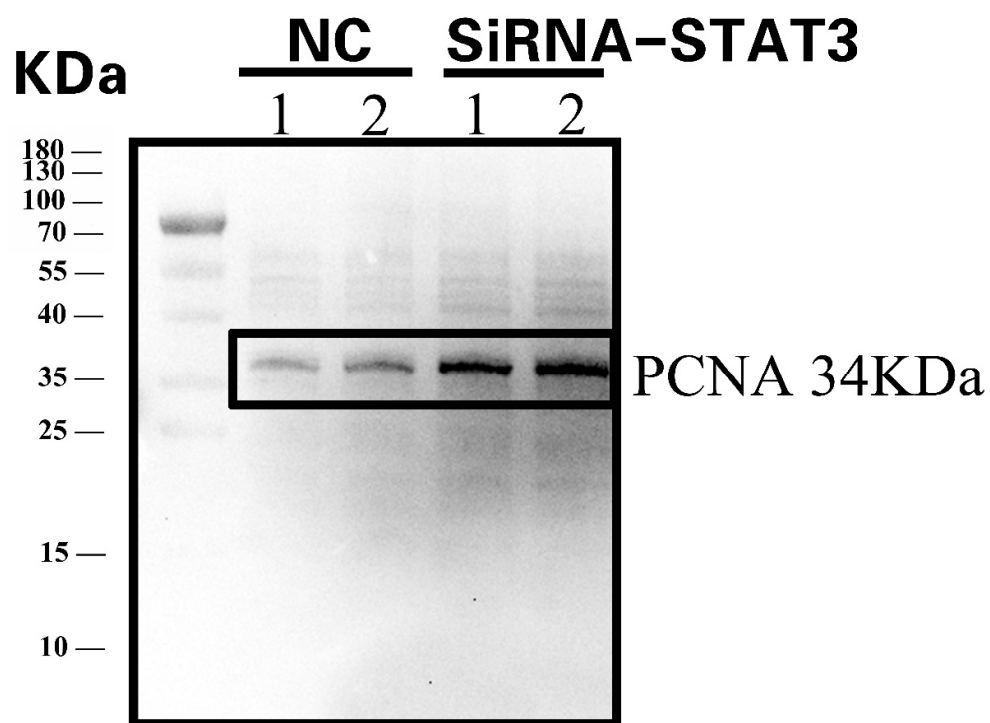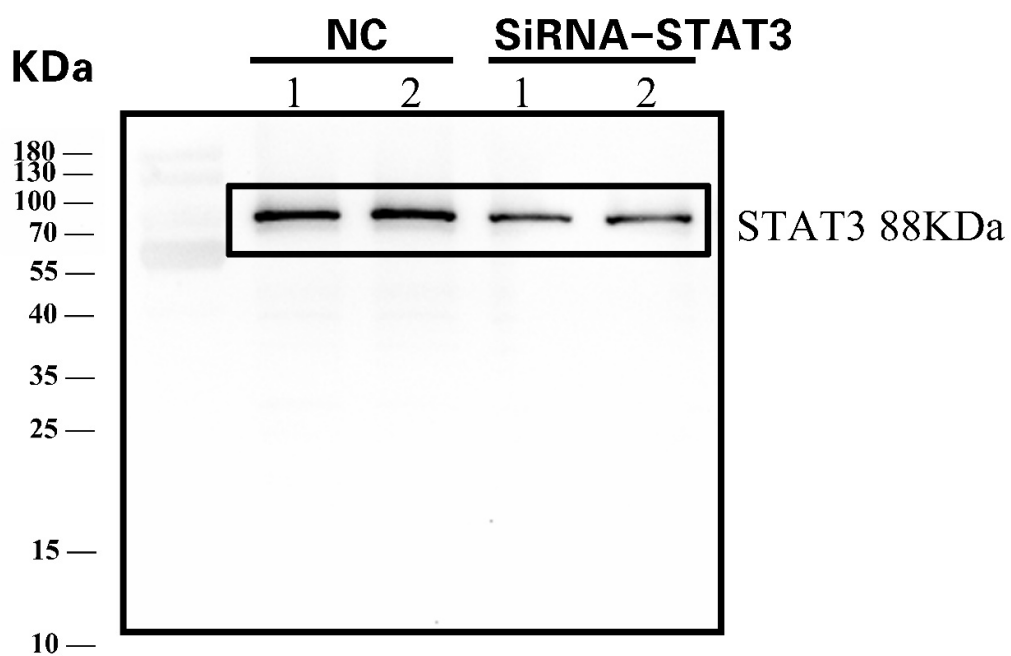

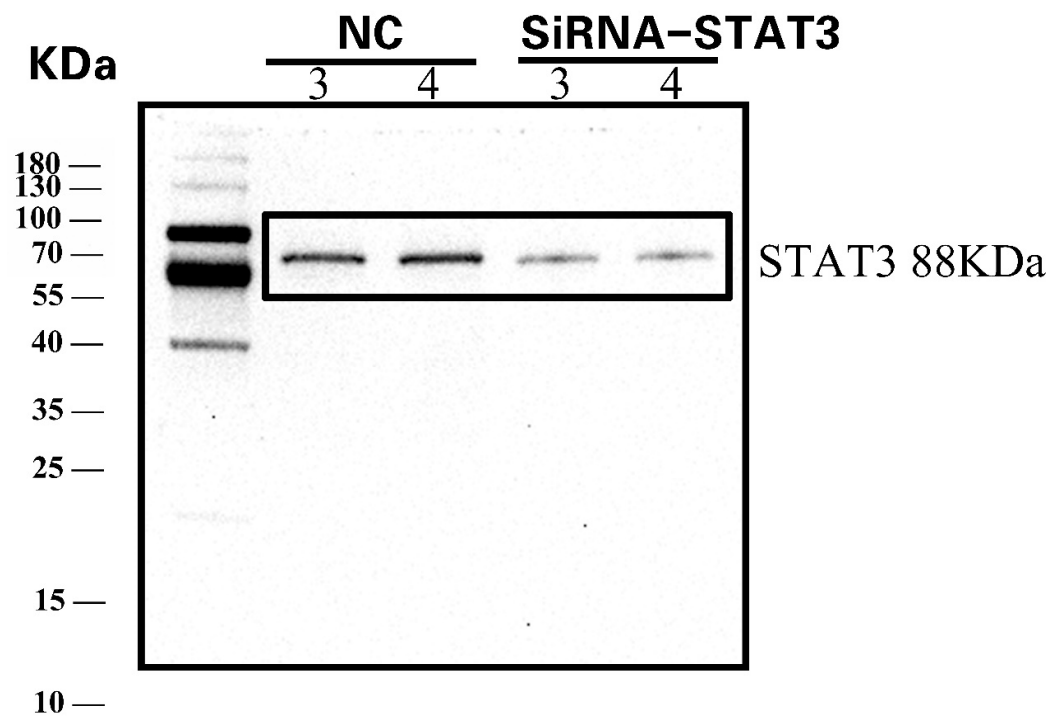

**Figure S4.** Alterations in the expression of GAPDH, STAT3, P-STAT3, and PCNA proteins were observed in preadipocytes treated with either a SiRNA-STAT3 or a negative control (NC) construct.
